# Supplementary material
Source: PubMed Central journal article supplement (PMC7737203)
Supplement: pt0c00073_si_001.pdf [file pt0c00073_si_001.pdf]

## Supplemental Figures

### Compound AD16 reduces amyloid plaque deposition and modifies microglia in a transgenic mouse model of Alzheimer's disease

Ping Sun<sup>†,‡</sup>, Hu Yue<sup>†</sup>, Qi Xing<sup>‡</sup>, Wenmin Deng<sup>†</sup>, Yitao Ou<sup>†</sup>, Guangjin Pan<sup>‡</sup>, Xiaofen Zhong<sup>‡,\*</sup>, Wenhui Hu<sup>†,\*</sup>

<sup>†</sup> Key Laboratory of Molecular Target & Clinical Pharmacology and State Key Laboratory of Respiratory Disease, School of Pharmaceutical Sciences & the Fifth Affiliated Hospital, Guangzhou Medical University, Guangzhou, Guangdong, 511436, China

<sup>‡</sup> Guangzhou Institutes of Biomedicine and Health, Chinese Academy of Sciences, Guangzhou, Guangdong, 510530, China

\* Corresponding Authors

Xiaofen Zhong: Guangzhou Institutes of Biomedicine and Health, Chinese Academy of Sciences, Guangzhou, Guangdong, 510530, China; Email: [zhong\\_xiaofen@gibh.ac.cn](mailto:zhong_xiaofen@gibh.ac.cn)

Wenhui Hu: School of Pharmaceutical Sciences & the Fifth Affiliated Hospital, Guangzhou Medical University, Guangzhou, Guangdong, 511436, China; Email: [huwenhui@gzhmu.edu.cn](mailto:huwenhui@gzhmu.edu.cn)

#### Table of contents

|                |          |
|----------------|----------|
| Figure S1..... | Page S-2 |
| Figure S2..... | Page S-3 |
| Figure S3..... | Page S-4 |
| Figure S4..... | Page S-5 |
| Figure S5..... | Page S-6 |

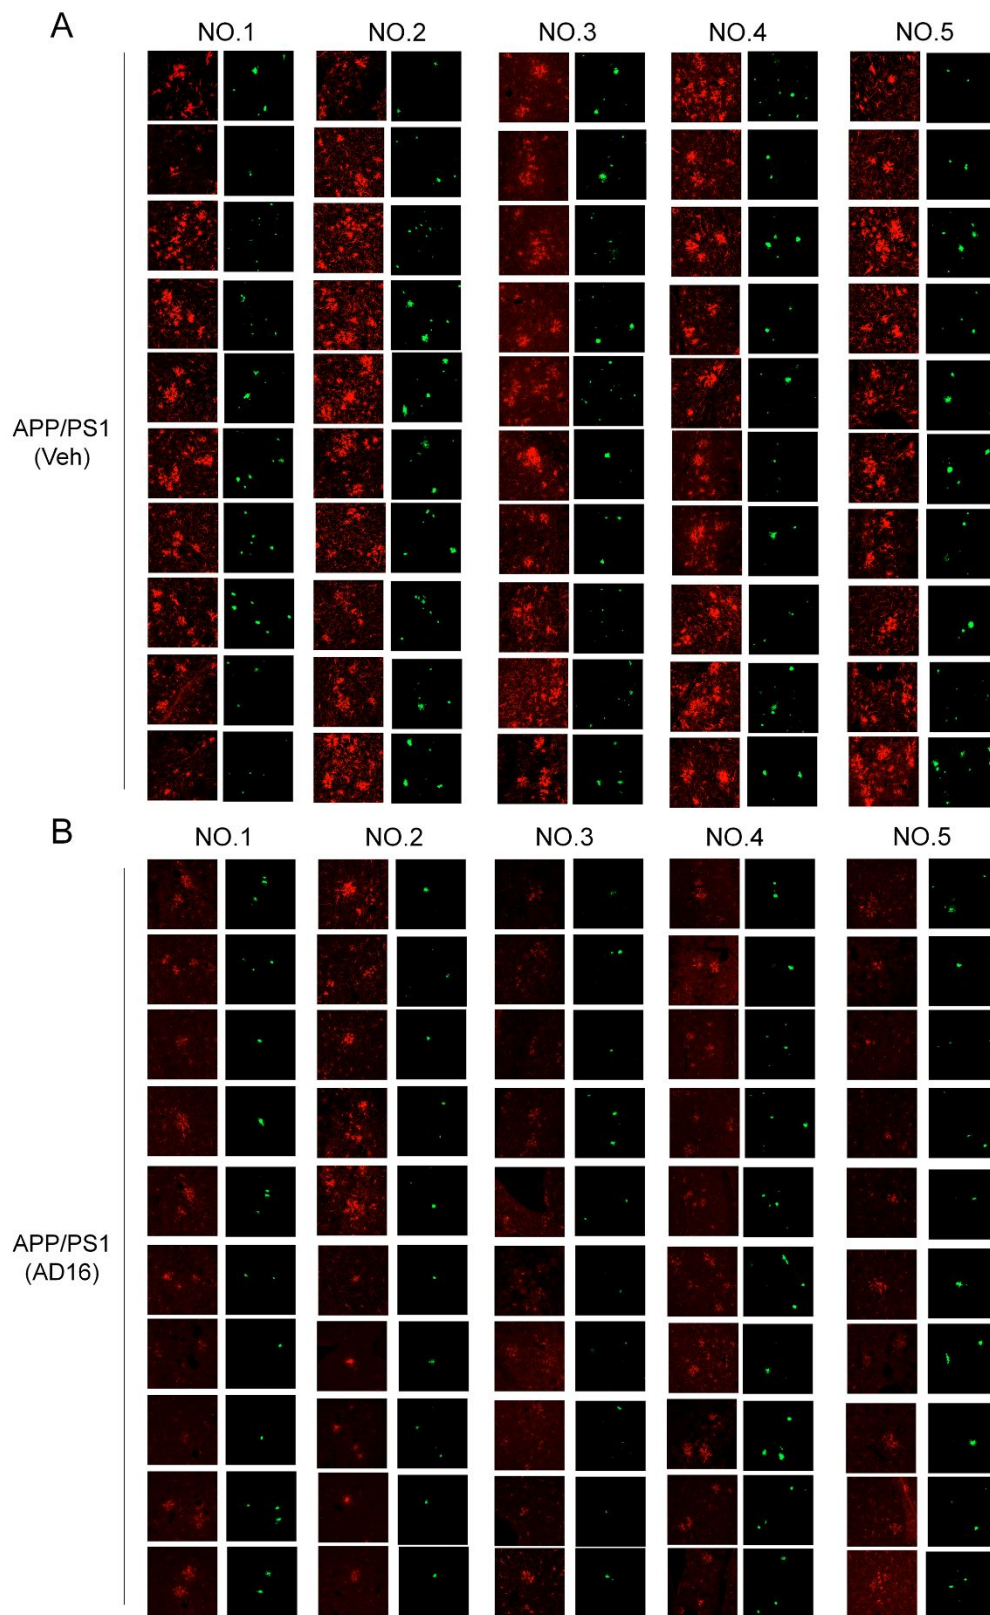

**Figure S1. Co-staining of Iba-1 and ThS positive amyloid plaque in the hippocampus of APP/PS1 group (A) and AD16 treated group (B).**

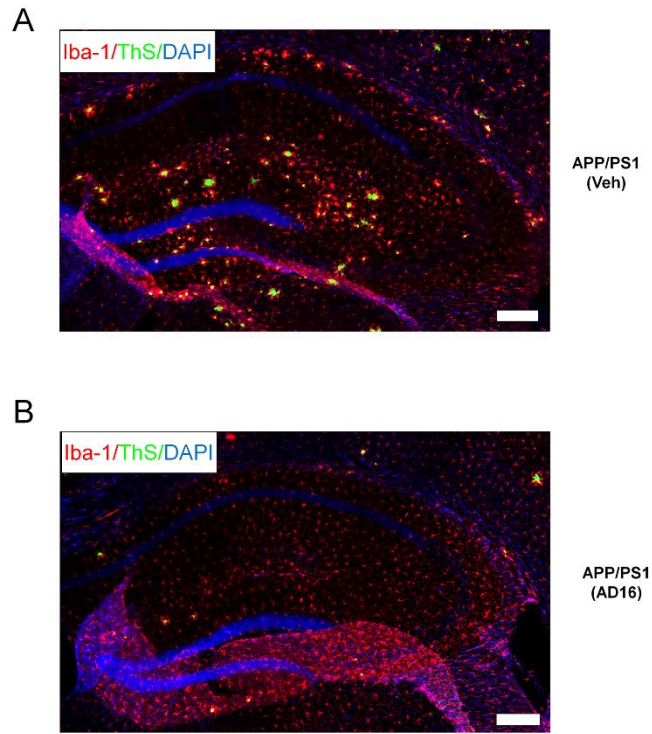

**Figure S2. Representative co-staining of Iba-1, ThS and DAPI in the hippocampus of APP/PS1 group (A) and AD16 treated group (B).**

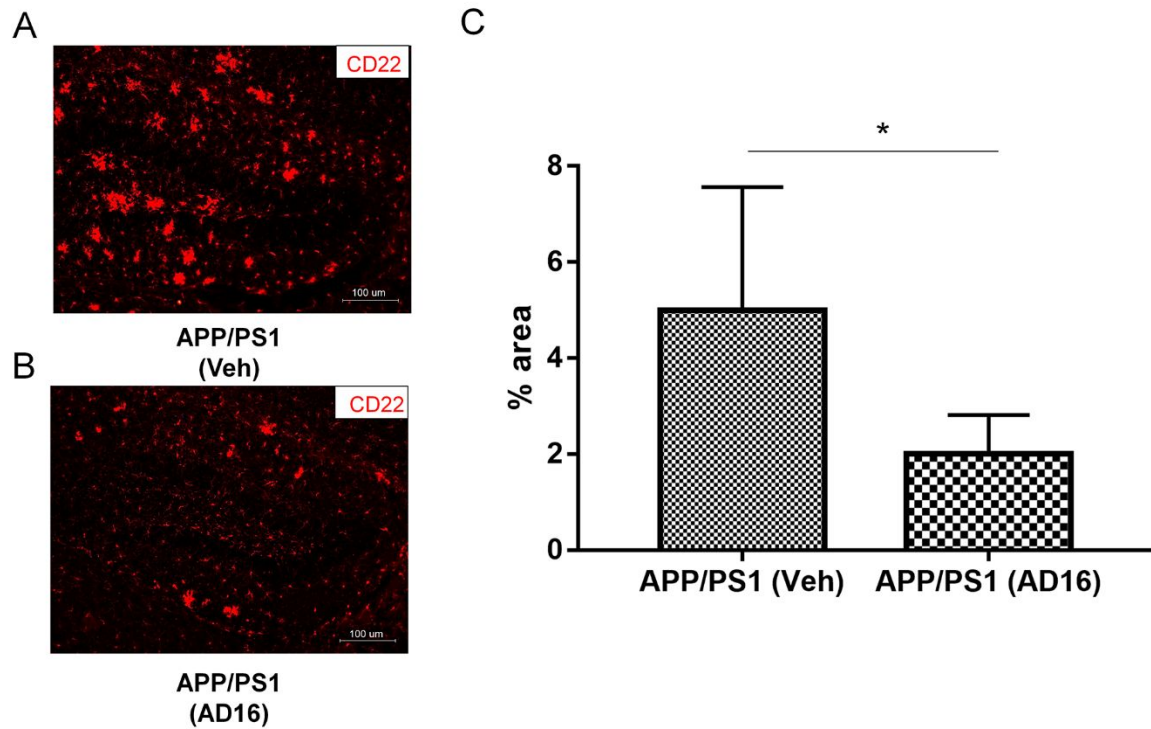

**Figure S3. AD16 reduces CD22 expression in the brain of APP/PS1 mice.**

Representative immunostaining of CD22 in the hippocampus and cortex of APP/PS1 group (A) and AD16 treated group (B). Quantification of the area of CD22 positive microglia in the brain of AD mice receiving AD16 or vehicle (C). Data are presented as means  $\pm$  SD.  $*p < 0.05$ .

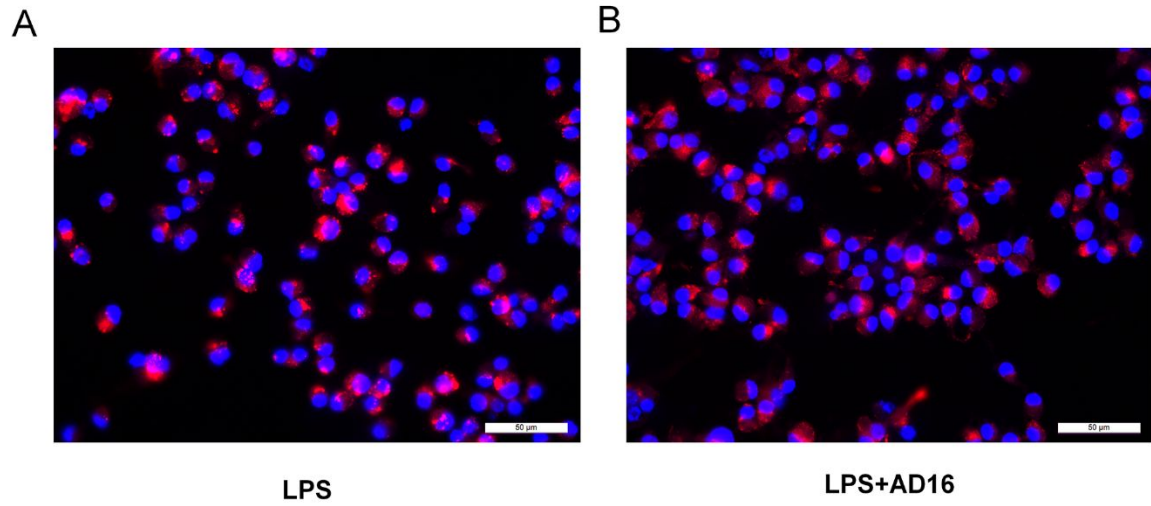

**Figure S4. AD16 alters lysosomal distribution in BV2 microglial cells.** Lysosomal distributions were detected through lysotracker staining in BV2 microglial cells (A, B).

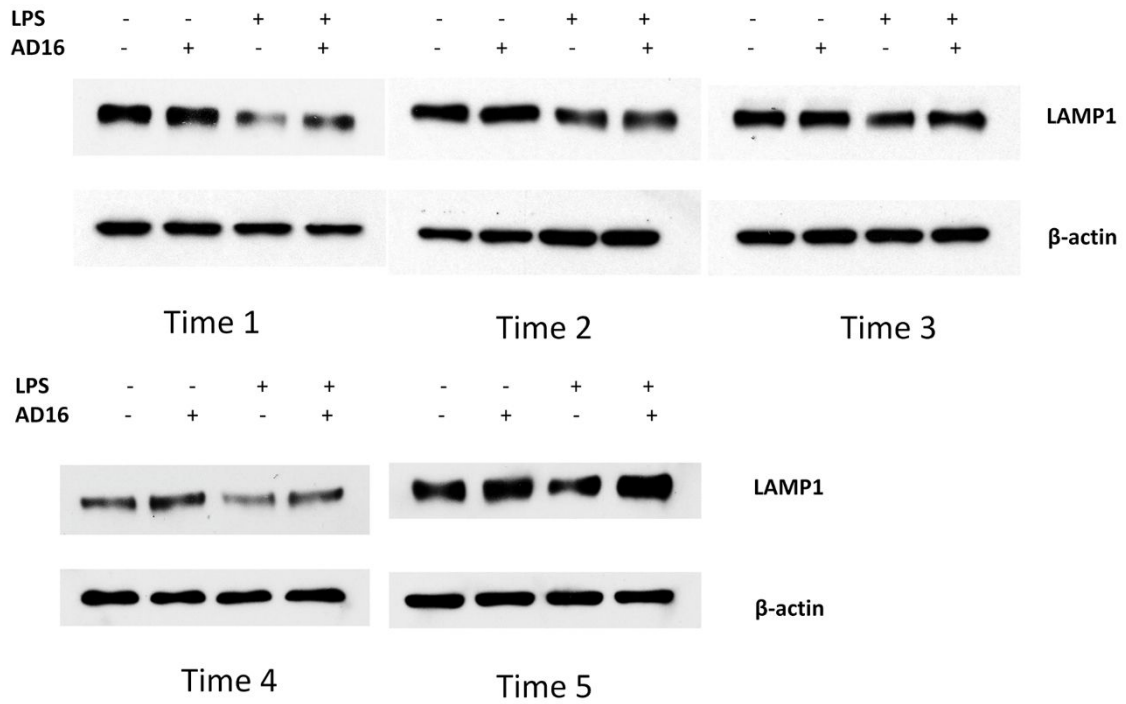

**Figure S5. Immunoblot assays against LAMP1 protein were shown (5 times using independent samples).**
